# Supplementary material
Source: PubMed Central journal article supplement (PMC2796936)
Supplement: supp_137.1.103_DEV043067TableS1.pdf [file supp_137.1.103_DEV043067TableS1.pdf]

**Table S1. List of binary vectors**

| Vector | Construct             | <i>Arabidopsis</i> chromosome: start-end*               | Purpose                                    |
|--------|-----------------------|---------------------------------------------------------|--------------------------------------------|
| pJP123 | 35S: <i>miR396b</i>   | 5: 13628907 - 13629319                                  | Overexpression of <i>miR396b</i> stem-loop |
| pRER34 | <i>GRF2</i>           | 4: 17729683 - 17725302                                  | Genomic <i>GRF2</i>                        |
| pRER35 | <i>rGRF2</i>          | CGT CAT CGT TCA AGA AAG CCT GTG GAA GTC CAA             | Genomic mutant <i>GRF2</i>                 |
|        |                       | 4: 17729683 - 17725302                                  |                                            |
| pRER55 | <i>GRF2:GRF2-GUS</i>  | CGT CAT CGT TCT AGA AAA CCG GTC GAA GTC CAA             | Reporter                                   |
|        |                       | [ <i>GRF2:GRF2</i> , 4: 17729683 - 17725702] - GUS CDS  |                                            |
| pRER56 | <i>GRF2:rGRF2-GUS</i> | [ <i>GRF2:rGRF2</i> , 4: 17729683 - 17725702] - GUS CDS | Reporter                                   |

All constructs were cloned in the binary vector pCHF3 (Jarvis et al., 1998). T-DNA constructs were introduced into *Agrobacterium tumefaciens* strain ASE (Fraleley et al., 1985).  
 \*Highlighted in yellow, nucleotides annealing with miR396; underlined, mutagenized residues; highlighted in red, upstream and downstream codons.

## References

- Fraleley, R. T., Rogers, S. G., Horsch, R. B., Eichholtz, D. A., Flick, J. S., Fink, C. L., Hoffmann, N. L. and Sanders, P. R. (1985). The SEV system: a new disarmed Ti plasmid vector system for plant transformation. *Biotechnology* **3**, 629-635.
- Jarvis, P., Chen, L. J., Li, H., Peto, C. A., Fankhauser, C. and Chory, J. (1998). An *Arabidopsis* mutant defective in the plastid general protein import apparatus. *Science* **282**, 100-103.
