# Supplementary material
Source: PubMed Central journal article supplement (PMC2796936)
Supplement: supp_137.1.103_DEV043067TableS2.pdf [file supp_137.1.103_DEV043067TableS2.pdf]

**Table S2. Relevant locus IDs, oligonucleotide primers used in RT-qPCR and polymorphisms used**

| Gene           | Locus ID  | Forward primer                      | Reverse primer                       | Polymorphism                                |
|----------------|-----------|-------------------------------------|--------------------------------------|---------------------------------------------|
| <i>GRF1</i>    | At2g22840 | ATGGAAAGAAATGGCGGTGCTC              | CGGCGGCAGCATTAGTATTGT                |                                             |
| <i>GRF2</i>    | At4g37740 | CACATCAACAGAGGCCGTCATCG             | AACCGGAGATTCCTTGGGTTGTAAG            |                                             |
| <i>GRF3</i>    | At2g36400 | GTCTTCGCTGGCCACAAGTATT              | TGTTGCTGTTGTAGTGGTGGCT               |                                             |
| <i>GRF4</i>    | At3g52910 | GCCACATTCACCGTGGAAGAAA              | CCACTGTTAGCTTCATATGGCCTC             |                                             |
| <i>GRF5</i>    | At3g13960 | CTCTTCATCATGCTTCCGCTTT              | TTGCTAACGGTTGTTGGTGATG               | SALK_086597*                                |
| <i>GRF6</i>    | At2g06200 | TCCTCAAGAAAGCCTCCTCCTA              | ATCTTCCATTGCTGAGCCAGAG               |                                             |
| <i>GRF7</i>    | At5g53660 | TGCGCGAAAGAAGTCGTCTCTA              | CACCATTGTTGTTAGGGCGAGA               |                                             |
| <i>GRF8</i>    | At4g24150 | GCATGTGGAATCATCTCACCAA              | TCTCCGGGTTTAAGGTTCCAAT               |                                             |
| <i>GRF9</i>    | At2g45480 | GCTGCAAAATTCTCAAGCAACA              | GCACCTTCTGGTTCATTGTCT                |                                             |
| <i>PP2A</i>    | At1g13320 | CCTGCGGTAATAACTGCATCT               | CTTCACTTAGCTCCACCAAGCA               |                                             |
| <i>MIR396b</i> | At5g35407 | ATGGATCCAAACCCTGAATTGTCATGTTTTCCACA | AGGGTACCATGAAGATCCTGGTCATACTTTTCCACA |                                             |
| <i>MIR396a</i> | At2g10606 | CCTGGATCCATCTTCTTCTCACAACTTCAACTTC  | CCTCTGCAGTCTAGCTACAATATAGTTGGTAGTC   |                                             |
| <i>KNOLLE</i>  | At1g08560 | GGTCTTGGAAACTGTGGTTGAG              | CAGTCTTCAGCTCATTAGCTCCATC            |                                             |
| <i>CYCB1;1</i> | At4g37490 | CAGTTCCGACTCATTATGTCTTCC            | TCCCTTCTTCTTGTGCTTCCA                |                                             |
| <i>GIF1</i>    | At5g28640 | TTGGACGAAAACAAATCGTTGA              | CTGTTGCTGTTGAGTCGCTTGT               | <i>an3-1</i>                                |
| <i>TCP4</i>    | At3g15030 | CCTTCAACGACGTCGTTTCAGCCAG           | GTGAACCGGTGGAGGAAGGTGATG             | <i>soj8<sup>†</sup> - rTCP4<sup>‡</sup></i> |

\*For a full description of this mutant, see Horiguchi et al. (Horiguchi et al., 2005).

<sup>†</sup>Palatnik et al., 2007.

<sup>‡</sup>Schommer et al., 2008.

## References

Palatnik, J. F., Wollmann, H., Schommer, C., Schwab, R., Boisbouvier, J., Rodriguez, R., Warthmann, N., Allen, E., Dezulian, T., Huson, D. et al. (2007). Sequence and expression differences underlie functional specialization of arabidopsis microRNAs miR159 and miR319. *Dev. Cell* **13**, 115-125.

Schommer, C., Palatnik, J. F., Aggarwal, P., Chetelat, A., Cubas, P., Farmer, E. E., Nath, U. and Weigel, D. (2008). Control of jasmonate biosynthesis and senescence by miR319 targets. *PLoS Biol.* **6**, e230.
