# Supplementary material
Source: PubMed Central journal article supplement (PMC2796936)
Supplement: supp_137.1.103_DEV043067TableS3.pdf [file supp_137.1.103_DEV043067TableS3.pdf]

**Table S3. *GRF* expression in 35S:*miR396b* plants compared to that in wild type, as estimated by Affymetrix microarray**

| Description | Relative expression* |
|-------------|----------------------|
| <i>GRF1</i> | 0.81                 |
| <i>GRF2</i> | 0.58                 |
| <i>GRF3</i> | 0.73                 |
| <i>GRF4</i> | WA                   |
| <i>GRF5</i> | 0.89                 |
| <i>GRF6</i> | A                    |
| <i>GRF7</i> | 0.57                 |
| <i>GRF8</i> | A                    |
| <i>GRF9</i> | NP                   |

\*Fold change relative to wild type, normalized with gcRMA. The average of two biological replicates for each genotype is shown.

A, a gene termed 'absent' by MAS 5.0 software (Affymetrix); NP, not present in ATH1 arrays; WA, wrongly annotated in ATH1 arrays.
