# Supplementary material
Source: PubMed Central journal article supplement (PMC2796936)
Supplement: supp_137.1.103_DEV043067TableS4.pdf [file supp_137.1.103_DEV043067TableS4.pdf]

**Table S4. Genes differentially expressed in 35S:miR396b seedlings compared to that in wild type**

| AffyGI    | Score*  | Identifier | Description                                                  | Relative expression† |
|-----------|---------|------------|--------------------------------------------------------------|----------------------|
| 266516_at | -4,0816 | At2g47880  | Glutaredoxin family protein                                  | 0.51                 |
| 257003_at | -4,0181 | At3g14110  | Tetratricopeptide repeat (TPR)-containing protein            | 0.48                 |
| 252327_at | -4,0117 | At3g48740  | Nodulin MtN3 family protein                                  | 0.71                 |
| 262286_at | -3,754  | At1g68585  | Expressed protein                                            | 0.79                 |
| 254794_at | -3,7253 | At4g12970  | Expressed protein                                            | 0.66                 |
| 245006_at | -3,3254 | psaB       | PSI P700 apoprotein A2                                       | 0.79                 |
| 262796_at | -3,2851 | At1g20850  | Cysteine endopeptidase, papain-type (XCP2)                   | 0.74                 |
| 249645_at | -3,2324 | At5g36910  | Thionin (THI2.2)                                             | 0.62                 |
| 264802_at | -3,1706 | At1g08560  | Syntaxin-related protein KNOLLE (KN) / syntaxin 111 (SYP111) | 0.70                 |
| 261135_at | -3,1565 | At1g19610  | Plant defensin-fusion protein, putative (PDF1.4)             | 0.62                 |
| 249052_at | -3,0618 | At5g44420  | Plant defensin protein, putative (PDF1.2a)                   | 0.34                 |
| 260830_at | -3,0002 | At1g06760  | Histone H1, putative                                         | 0.75                 |

\*Estimated by Logit-T 0.05%.

†Fold change relative to wild type, normalized with gcRMA. The average of two biological replicates for each genotype is shown.
