# Supplementary material
Source: PubMed Central journal article supplement (PMC2796936)
Supplement: supp_137.1.103_DEV043067TableS5.pdf [file supp_137.1.103_DEV043067TableS5.pdf]

**Table S5. Changes in expression levels of mitosis-specific genes in 35S:*miR396b* plants compared to that in wild type**

| Locus ID  | Relative expression* | Description                                                                   |
|-----------|----------------------|-------------------------------------------------------------------------------|
| At1g61450 | 0.574                | Expressed protein                                                             |
| At2g22610 | 0.612                | Kinesin motor protein related                                                 |
| At2g25060 | 0.636                | Plastocyanin-like domain-containing protein                                   |
| At3g12870 | 0.664                | Expressed protein                                                             |
| At3g02640 | 0.681                | Expressed protein                                                             |
| At3g25980 | 0.696                | Mitotic spindle checkpoint protein, putative (MAD2)                           |
| At1g08560 | 0.699                | Syntaxin-related protein KNOLLE (KN) / syntaxin 111 (SYP111)                  |
| At3g27330 | 0.711                | Zinc finger (C <sub>3</sub> HC <sub>4</sub> -type RING finger) family protein |
| At5g45700 | 0.719                | NLI interacting factor (NIF) family protein                                   |
| At4g02800 | 0.725                | Expressed protein                                                             |
| At2g33560 | 0.726                | Spindle checkpoint protein related                                            |
| At5g36710 | 0.731                | Expressed protein                                                             |
| At1g44110 | 0.736                | <i>CYCA1;1</i> <sup>†</sup>                                                   |
| At5g51600 | 0.747                | Microtubule-associated protein (MAP65/ASE1) family protein                    |
| At1g59540 | 0.749                | Kinesin motor protein related                                                 |
| At2g28620 | 0.754                | Kinesin motor protein related                                                 |
| At2g26760 | 0.754                | <i>CYCB1;4</i> <sup>†</sup>                                                   |
| At4g22860 | 0.762                | Expressed protein                                                             |
| At4g33400 | 0.765                | Dem protein-related / defective embryo and meristems protein related          |
| At5g11510 | 0.767                | myb family transcription factor (MYB3R4)                                      |
| At4g26660 | 0.776                | Expressed protein                                                             |
| At2g25880 | 0.778                | Serine/threonine protein kinase, putative                                     |
| At1g02730 | 0.784                | Cellulose synthase family protein                                             |
| At4g15830 | 0.788                | Expressed protein                                                             |
| At5g66230 | 0.793                | Expressed protein                                                             |
| At3g55660 | 0.794                | Expressed protein                                                             |
| At3g14190 | 0.796                | Expressed protein                                                             |
| At2g16270 | 0.802                | Expressed protein                                                             |
| At5g02370 | 0.805                | Kinesin motor protein related                                                 |
| At1g18370 | 0.805                | Kinesin motor family protein (NACK1)                                          |
| At1g76310 | 0.810                | <i>CYCB2;4</i> <sup>†</sup>                                                   |
| At4g35620 | 0.816                | <i>CYCB2;2</i> <sup>†</sup>                                                   |
| At5g13840 | 0.817                | WD-40 repeat family protein                                                   |
| At4g33260 | 0.821                | WD-40 repeat family protein                                                   |
| At4g01730 | 0.822                | Zinc finger (DHHC type) family protein                                        |
| At5g55830 | 0.837                | Lectin protein kinase, putative                                               |
| At2g17620 | 0.839                | <i>CYCB2;1</i> <sup>†</sup>                                                   |
| At3g51280 | 0.840                | Male sterility MS5, putative                                                  |
| At3g23890 | 0.846                | DNA topoisomerase, ATP-hydrolyzing / DNA topoisomerase II / DNA gyrase (TOP2) |
| At3g11520 | 0.848                | <i>CYCB1;3</i> <sup>†</sup>                                                   |
| At1g23790 | 0.855                | Expressed protein                                                             |
| At5g17160 | 0.855                | Expressed protein                                                             |
| At4g32830 | 0.860                | Protein kinase, putative                                                      |
| At5g55520 | 0.882                | Expressed protein                                                             |
| At5g62550 | 0.884                | Expressed protein                                                             |
| At3g19590 | 0.884                | WD-40 repeat family protein / mitotic checkpoint protein, putative            |
| At1g50490 | 0.885                | Ubiquitin-conjugating enzyme 20 (UBC20)                                       |
| At4g23800 | 0.890                | High mobility group (HMG1/2) family protein                                   |
| At5g67270 | 0.894                | Microtubule-associated EB1 family protein                                     |
| At5g48310 | 0.895                | Expressed protein                                                             |
| At1g34355 | 0.902                | Forkhead-associated domain-containing protein / FHA domain-containing protein |
| At3g20150 | 0.905                | Kinesin motor family protein                                                  |
| At3g23670 | 0.905                | Phragmoplast-associated kinesin-related protein, putative                     |
| At1g20930 | 0.917                | <i>CDKB2;2</i> <sup>†</sup>                                                   |
| At2g44190 | 0.917                | Expressed protein                                                             |
| At1g03780 | 0.921                | Targeting protein related                                                     |
| At1g69400 | 0.944                | Transducin family protein / WD-40 repeat family protein                       |
| At5g23910 | 0.948                | Kinesin motor protein related                                                 |
| At4g28430 | 0.951                | Reticulon family protein                                                      |
| At3g03090 | 0.953                | Sugar transporter family protein                                              |

|           |       |                                                            |
|-----------|-------|------------------------------------------------------------|
| At5g11300 | 0.957 | <i>CYCA2</i> ; <sup>†</sup>                                |
| At1g76540 | 0.959 | <i>CDKB2</i> ;1 <sup>†</sup>                               |
| At1g34460 | 0.964 | <i>CDKB1</i> ;5 <sup>†</sup>                               |
| At3g26050 | 0.968 | Expressed protein                                          |
| At5g15510 | 0.970 | Expressed protein                                          |
| At1g20590 | 0.971 | <i>CDKB2</i> ;5 <sup>†</sup>                               |
| At4g05520 | 0.974 | Calcium-binding EF-hand family protein                     |
| At1g33940 | 0.979 | Hypothetical protein                                       |
| At1g72250 | 1.001 | Kinesin motor protein related                              |
| At5g60930 | 1.006 | Chromosome-associated kinesin, putative                    |
| At3g60840 | 1.027 | Microtubule-associated protein (MAP65/ASE1) family protein |
| At4g11080 | 1.048 | High-mobility group (HMG1/2) family protein                |
| At4g05190 | 1.067 | Kinesin-like protein A, putative                           |
| At2g47500 | 1.094 | Kinesin motor protein related                              |
| At4g28230 | 1.111 | Expressed protein                                          |
| At3g03130 | 1.118 | Expressed protein                                          |
| At1g75920 | 1.153 | Family II extracellular lipase 5 (EXL5)                    |
| At1g16330 | 1.159 | <i>CYCB3</i> ;1 <sup>†</sup>                               |
| At5g33300 | 1.195 | Chromosome-associated kinesin-related                      |
| At2g38160 | 1.237 | Expressed protein                                          |

\*Fold change relative to wild type, normalized with gcRMA. The average of two biological replicates for each genotype is shown.

<sup>†</sup>Nomenclature for core cell cycle genes of *Arabidopsis* from Vandepoele et al. (Vandepoele et al., 2002).

#### Reference

Vandepoele, K., Raes, J., De Veylder, L., Rouzé, P., Rombauts, S. and Inzé, D. (2002). *The Plant Cell* **14**, 903-916.
