# Supplementary material
Source: PubMed Central journal article supplement (PMC2796936)
Supplement: supp_137.1.103_DEV043067TableS6.pdf [file supp_137.1.103_DEV043067TableS6.pdf]

**Table S6. Gene set enrichment analysis of different gene sets in 35S:miR396b in comparison to wild type**

| Gene set*              | Size | NES <sup>†</sup> | Nominal <i>P</i> -value | False discovery rate | Significantly different from wild type <sup>‡</sup> |
|------------------------|------|------------------|-------------------------|----------------------|-----------------------------------------------------|
| Mitosis-specific genes | 79   | -5.081           | <0.000                  | <0.000               | Yes                                                 |
| Histones               | 56   | -3.922           | <0.000                  | <0.000               | Yes                                                 |
| Reference genes        | 25   | 0.877            | 0.597                   | 0.605                | No                                                  |
| DEFL                   | 35   | 1.258            | 0.218                   | 0.502                | No                                                  |
| Photosynthesis         | 74   | 1.364            | 0.136                   | 0.678                | No                                                  |

\*Gene set sources. Mitosis-specific genes are from Menges et al. (Menges et al., 2005). *Arabidopsis* histones and histone linker proteins from The Chromatin Database (Gendler et al., 2008). Reference genes are a selection of stably expressed genes (Czechowski et al., 2005) used in this analysis as a negative control. DEFL, defensin-like genes from Silverstein et al. (Silverstein et al., 2005). Photosynthesis, including Calvin cycle and light reactions, extracted from Aracyc (www.arabidopsis.org).

<sup>†</sup>NES, normalized enrichment score. A negative value indicates downregulation in 35S:miR396b plants.

<sup>‡</sup>A gene set is significantly different in 35S:miR396b compared to wild type when the nominal *P*-value and false discovery rate are <0.05.

## References

- Czechowski, T., Stitt, M., Altmann, T., Udvardi, M. K. and Scheible, W. R.** (2005). Genome-wide identification and testing of superior reference genes for transcript normalization in *Arabidopsis*. *Plant Physiol.* **139**, 5-17.
- Gendler, K., Paulsen, T. and Napoli, C.** (2008). ChromDB: the chromatin database. *Nucleic Acids Res.* **36**, 298-302.
- Menges, M., de Jager, S. M., Gruissem, W. and Murray, J. A.** (2005). Global analysis of the core cell cycle regulators of *Arabidopsis* identifies novel genes, reveals multiple and highly specific profiles of expression and provides a coherent model for plant cell cycle control. *The Plant Journal* **41**, 546-566.
- Silverstein, K. A. T., Graham, M. A., Paape, T. D. and Vanden Bosch, K. A.** (2005). Genome organization of more than 300 defensin-like genes in *Arabidopsis*. *Plant Physiology* **138**, 600-610.
